# Supplementary material for: Identification and characterization of long non-coding RNAs involved in osmotic and salt stress in Medicago truncatula using genome-wide high-throughput sequencing
Source: PubMed Central journal article supplement (PMC4457090; doi:10.1186/s12870-015-0530-5), 2015-06-06
Supplement: 12870_2015_530_MOESM1_ESM.pdf [file 12870_2015_530_MOESM1_ESM.pdf]

Figure S1 The quality score (Q) value of RNA-seq from six samples.

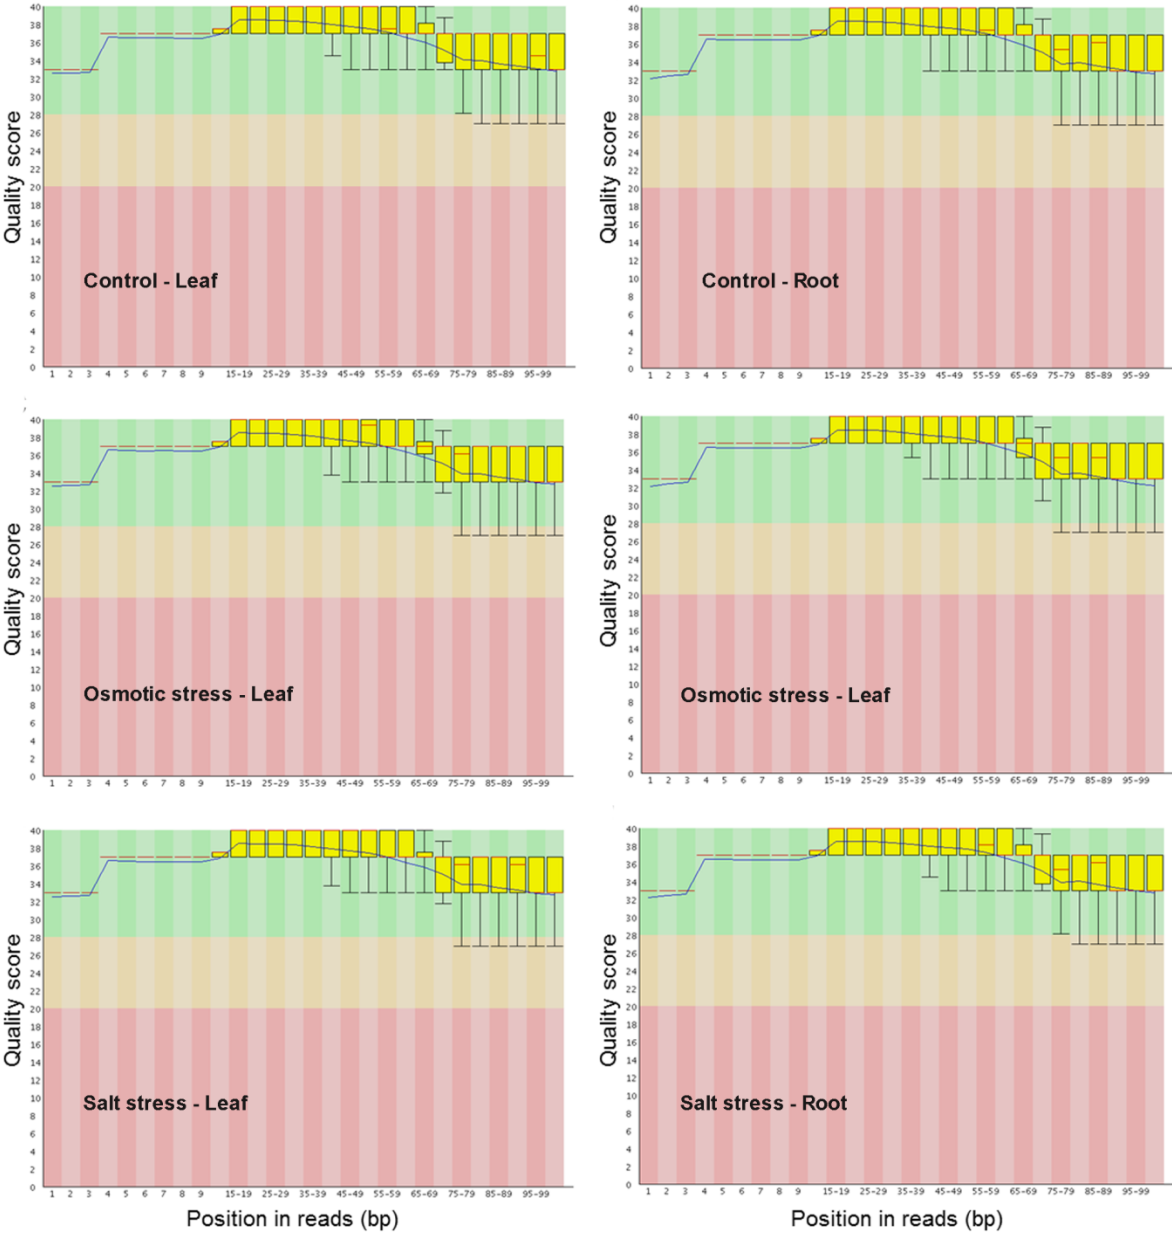

**Figure S2** Accumulative frequency of lncRNAs and mRNAs from leaves and roots under osmosis and salt stress.

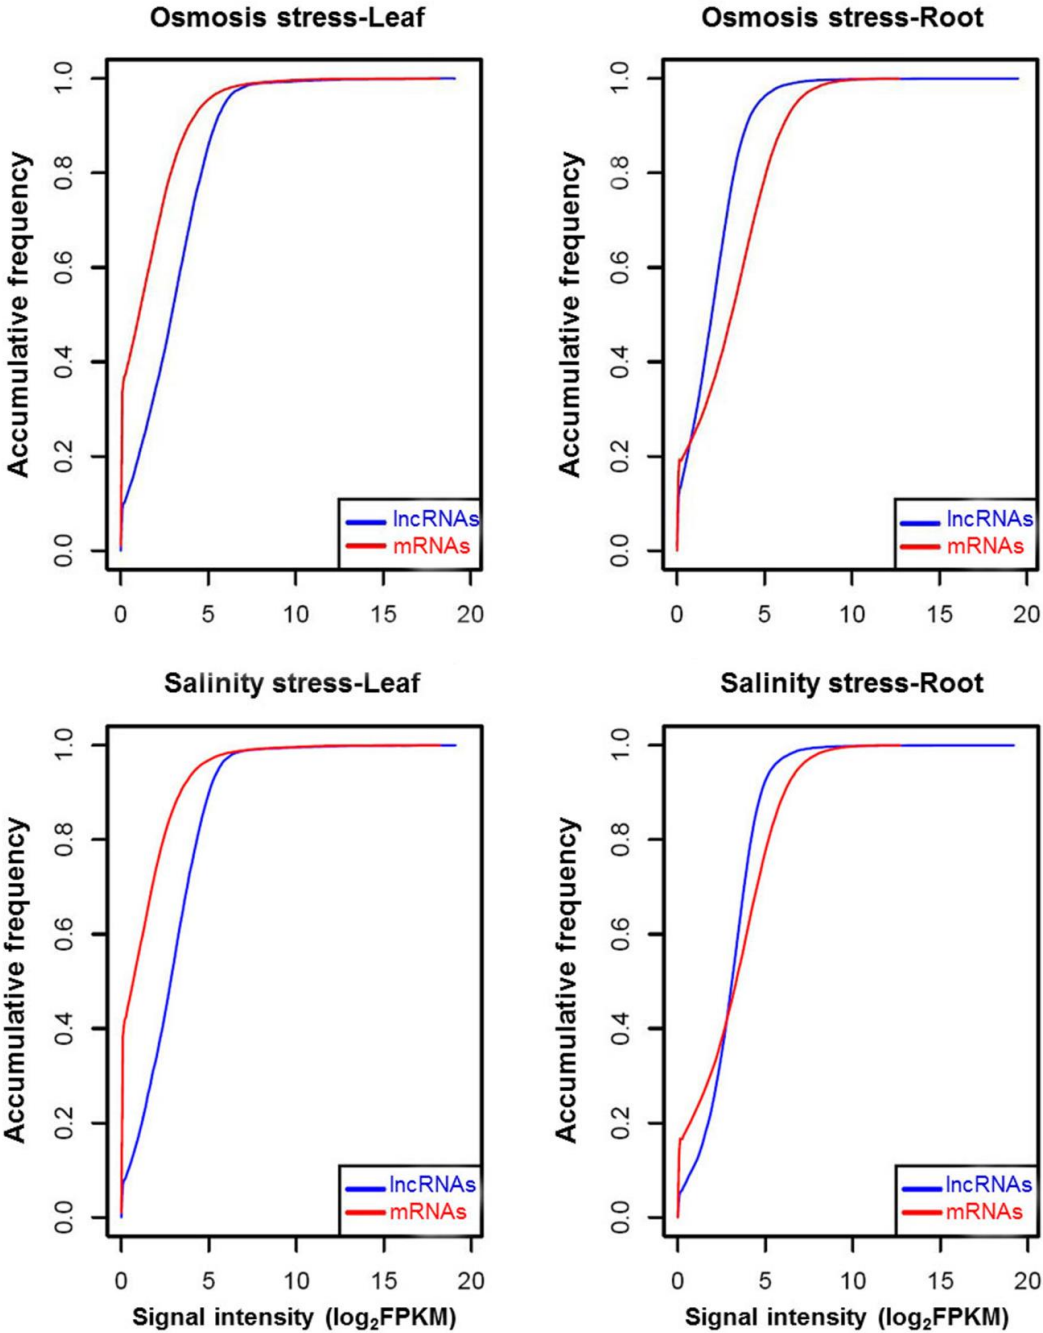

**Figure S3 Compare of expressional results between RNA-seq and qRT-PCR.**

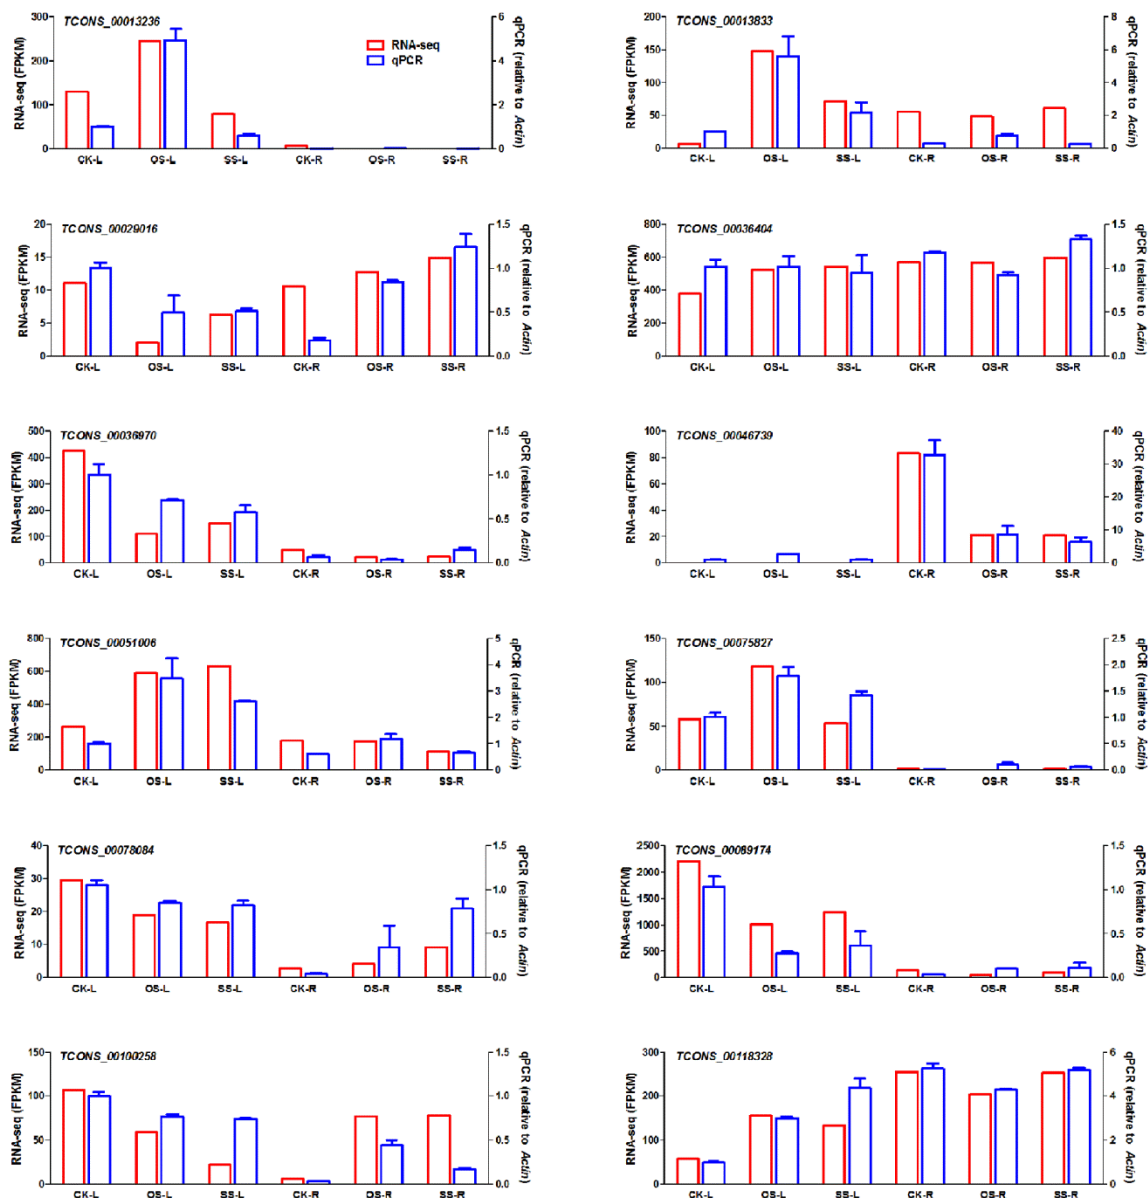

**Figure S4 The common and specific lncRNAs identified to be up-regulated (a) and down-regulated (b) in leaves and roots under osmosis and salt stress.**

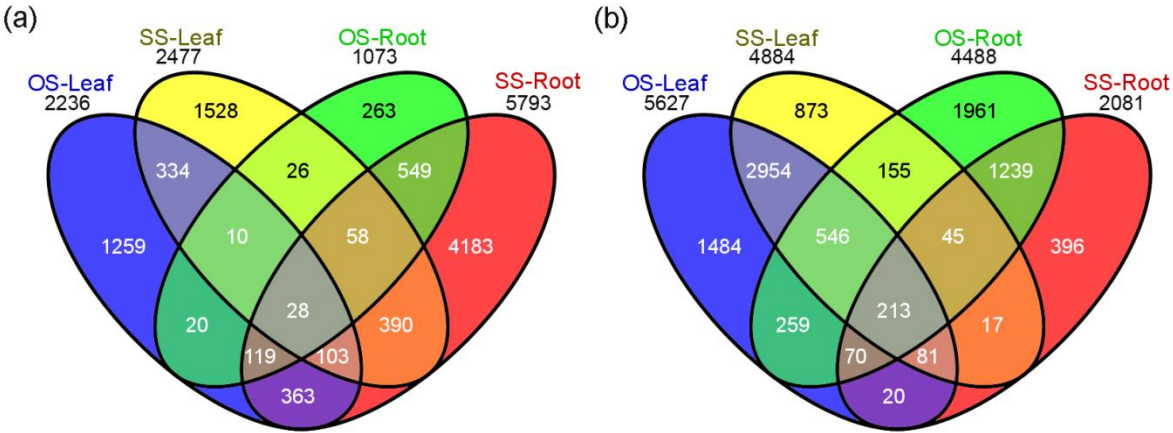

**Figure S5 GO enhancements in roots of *M. truncatula* under osmotic stress (a) and salt stress (b). The reliability is calculated by  $-\log_{10}(P\text{-value})$ .**

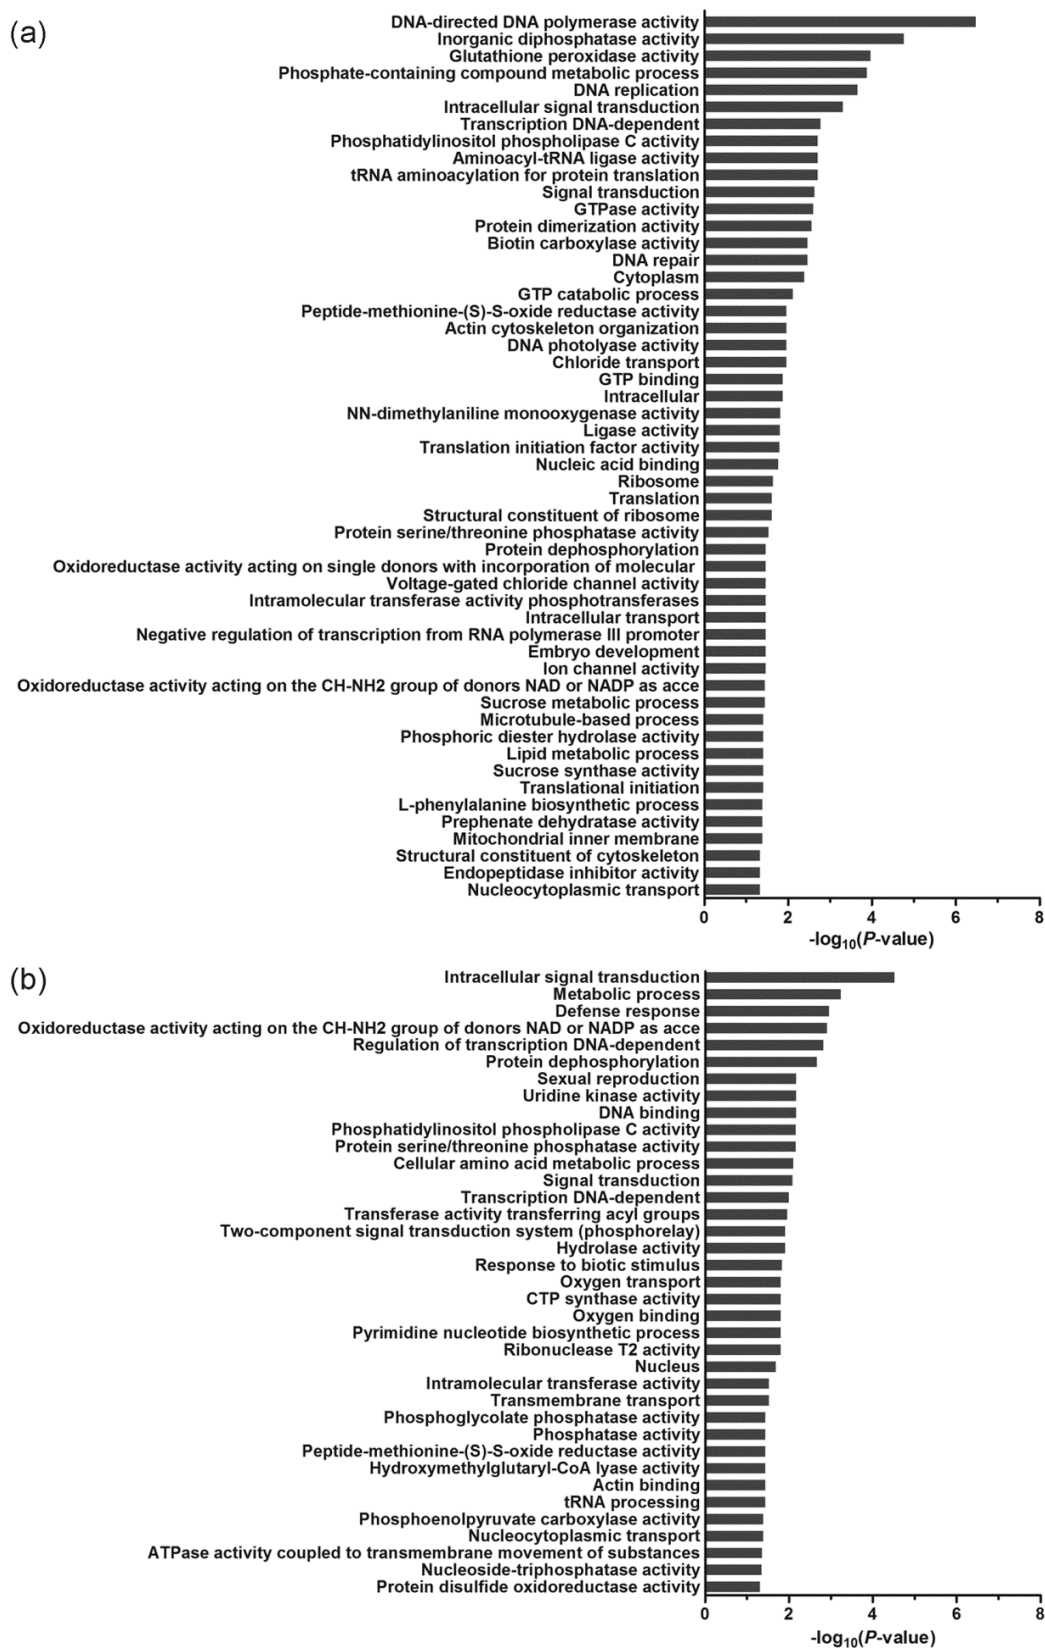

**Figure S6 The interaction networks among lncRNAs and protein-coding genes.**

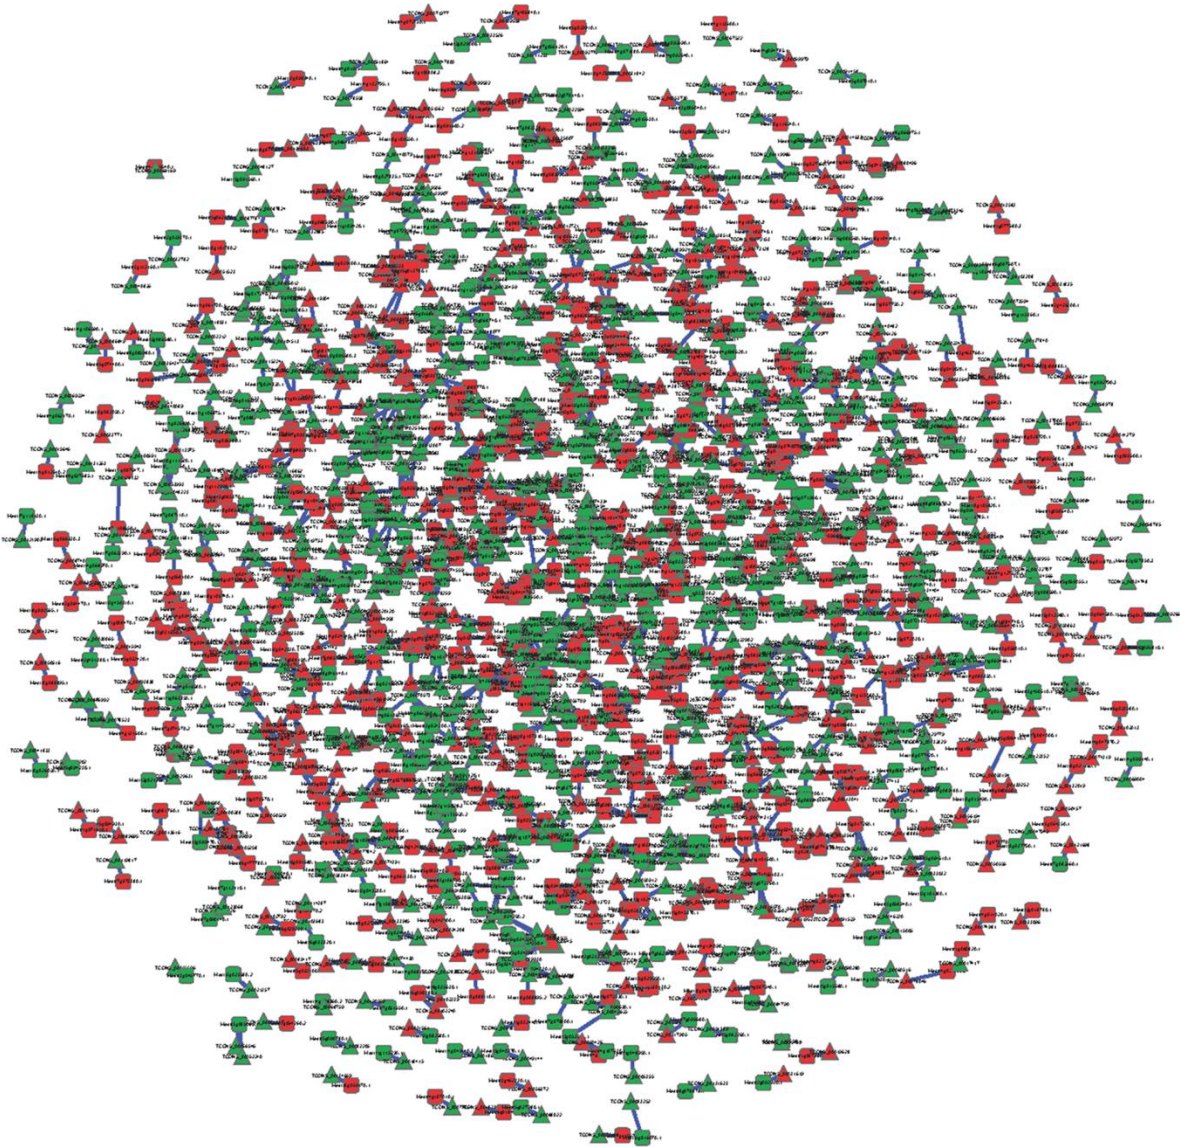

**Table S2 The GO enhancements in leaves under osmotic stress**

| GO term    | Description                                                                                           | $-\log_{10}(P\text{-value})$ |
|------------|-------------------------------------------------------------------------------------------------------|------------------------------|
| GO:0004089 | Carbonate dehydratase activity                                                                        | 5.53                         |
| GO:0015976 | Carbon utilization                                                                                    | 5.53                         |
| GO:0016887 | ATPase activity                                                                                       | 3.51                         |
| GO:0000156 | Two-component response regulator activity                                                             | 3.39                         |
| GO:0000160 | Two-component signal transduction system (phosphorelay)                                               | 3.34                         |
| GO:0055085 | Transmembrane transport                                                                               | 2.43                         |
| GO:0016874 | Ligase activity                                                                                       | 2.24                         |
| GO:0004075 | Biotin carboxylase activity                                                                           | 2.12                         |
| GO:0004435 | Phosphatidylinositol phospholipase C activity                                                         | 2.12                         |
| GO:0006412 | Translation                                                                                           | 1.92                         |
| GO:0003735 | Structural constituent of ribosome                                                                    | 1.78                         |
| GO:0006629 | Lipid metabolic process                                                                               | 1.71                         |
| GO:0008081 | Phosphoric diester hydrolase activity                                                                 | 1.71                         |
| GO:0009607 | Response to biotic stimulus                                                                           | 1.7                          |
| GO:0042218 | 1-aminocyclopropane-1-carboxylate biosynthetic process                                                | 1.7                          |
| GO:0016847 | 1-aminocyclopropane-1-carboxylate synthase activity                                                   | 1.7                          |
| GO:0006979 | Response to oxidative stress                                                                          | 1.69                         |
| GO:0051537 | 2 iron, 2 sulfur cluster binding                                                                      | 1.51                         |
| GO:0006535 | Cysteine biosynthetic process from serine                                                             | 1.51                         |
| GO:0004602 | Glutathione peroxidase activity                                                                       | 1.51                         |
| GO:0005840 | Ribosome                                                                                              | 1.49                         |
| GO:0016705 | Oxidoreductase activity, acting on paired donors, with incorporation or reduction of molecular oxygen | 1.48                         |
| GO:0009058 | Biosynthetic process                                                                                  | 1.44                         |
| GO:0004871 | Signal transducer activity                                                                            | 1.44                         |
| GO:0042626 | ATPase activity, coupled to transmembrane movement of substances                                      | 1.41                         |
| GO:0015935 | Small ribosomal subunit                                                                               | 1.4                          |

**Table S3 The GO enhancements in leaves under salt stress**

| GO term    | Description                        | $-\log_{10}(P\text{-value})$ |
|------------|------------------------------------|------------------------------|
| GO:0004089 | Carbonate dehydratase activity     | 4.38                         |
| GO:0015976 | Carbon utilization                 | 4.38                         |
| GO:0015934 | Large ribosomal subunit            | 2.11                         |
| GO:0006412 | Translation                        | 1.96                         |
| GO:0004075 | Biotin carboxylase activity        | 1.74                         |
| GO:0003735 | Structural constituent of ribosome | 1.72                         |
| GO:0008270 | Zinc ion binding                   | 1.61                         |
| GO:0019843 | rRNA binding                       | 1.5                          |



**Table S4 The GO enhancements in roots under osmotic stress**

| GO term    | Description                                                                             | $-\log_{10}(P\text{-value})$ |
|------------|-----------------------------------------------------------------------------------------|------------------------------|
| GO:0003887 | DNA-directed DNA polymerase activity                                                    | 6.52                         |
| GO:0004427 | Inorganic diphosphatase activity                                                        | 4.8                          |
| GO:0004602 | Glutathione peroxidase activity                                                         | 4.01                         |
| GO:0006796 | Phosphate-containing compound metabolic process                                         | 3.92                         |
| GO:0006260 | DNA replication                                                                         | 3.69                         |
| GO:0035556 | Intracellular signal transduction                                                       | 3.35                         |
| GO:0006351 | Transcription, DNA-dependent                                                            | 2.81                         |
| GO:0006418 | tRNA aminoacylation for protein translation                                             | 2.74                         |
| GO:0004812 | Aminoacyl-trna ligase activity                                                          | 2.74                         |
| GO:0004435 | Phosphatidylinositol phospholipase C activity                                           | 2.74                         |
| GO:0007165 | Signal transduction                                                                     | 2.66                         |
| GO:0003924 | Gtpase activity                                                                         | 2.64                         |
| GO:0046983 | Protein dimerization activity                                                           | 2.59                         |
| GO:0006281 | DNA repair                                                                              | 2.5                          |
| GO:0004075 | Biotin carboxylase activity                                                             | 2.5                          |
| GO:0005737 | Cytoplasm                                                                               | 2.42                         |
| GO:0006184 | GTP catabolic process                                                                   | 2.15                         |
| GO:0006821 | Chloride transport                                                                      | 2                            |
| GO:0003913 | DNA photolyase activity                                                                 | 2                            |
| GO:0030036 | Actin cytoskeleton organization                                                         | 2                            |
| GO:0008113 | Peptide-methionine-(S)-S-oxide reductase activity                                       | 2                            |
| GO:0005525 | GTP binding                                                                             | 1.91                         |
| GO:0005622 | Intracellular                                                                           | 1.91                         |
| GO:0004499 | N,N-dimethylaniline monooxygenase activity                                              | 1.86                         |
| GO:0016874 | Ligase activity                                                                         | 1.84                         |
| GO:0003743 | Translation initiation factor activity                                                  | 1.83                         |
| GO:0003676 | Nucleic acid binding                                                                    | 1.81                         |
| GO:0005840 | Ribosome                                                                                | 1.68                         |
| GO:0003735 | Structural constituent of ribosome                                                      | 1.65                         |
| GO:0006412 | Translation                                                                             | 1.65                         |
| GO:0004722 | Protein serine/threonine phosphatase activity                                           | 1.57                         |
| GO:0006470 | Protein dephosphorylation                                                               | 1.51                         |
| GO:0005216 | Ion channel activity                                                                    | 1.5                          |
| GO:0009790 | Embryo development                                                                      | 1.5                          |
| GO:0016480 | Negative regulation of transcription from RNA polymerase III promoter                   | 1.5                          |
| GO:0046907 | Intracellular transport                                                                 | 1.5                          |
| GO:0016868 | Intramolecular transferase activity, phosphotransferases                                | 1.5                          |
| GO:0005247 | Voltage-gated chloride channel activity                                                 | 1.5                          |
| GO:0016701 | Oxidoreductase activity, acting on single donors with incorporation of molecular oxygen | 1.5                          |

|            |                                                                                                    |      |
|------------|----------------------------------------------------------------------------------------------------|------|
| GO:0005985 | Sucrose metabolic process                                                                          | 1.49 |
| GO:0016639 | Oxidoreductase activity, acting on the CH-NH <sub>2</sub> group of donors, NAD or NADP as acceptor | 1.49 |
| GO:0006629 | Lipid metabolic process                                                                            | 1.45 |
| GO:0008081 | Phosphoric diester hydrolase activity                                                              | 1.45 |
| GO:0007017 | Microtubule-based process                                                                          | 1.45 |
| GO:0006413 | Translational initiation                                                                           | 1.45 |
| GO:0016157 | Sucrose synthase activity                                                                          | 1.45 |
| GO:0005743 | Mitochondrial inner membrane                                                                       | 1.43 |
| GO:0004664 | Prephenate dehydratase activity                                                                    | 1.43 |
| GO:0009094 | L-phenylalanine biosynthetic process                                                               | 1.43 |
| GO:0006913 | Nucleocytoplasmic transport                                                                        | 1.37 |
| GO:0004866 | Endopeptidase inhibitor activity                                                                   | 1.37 |
| GO:0005200 | Structural constituent of cytoskeleton                                                             | 1.37 |

---

**Table S5 The GO enhancements in roots under salt stress**

| GO term    | Description                                                                                        | $-\log_{10}(P\text{-value})$ |
|------------|----------------------------------------------------------------------------------------------------|------------------------------|
| GO:0035556 | Intracellular signal transduction                                                                  | 4.56                         |
| GO:0008152 | Metabolic process                                                                                  | 3.28                         |
| GO:0006952 | Defense response                                                                                   | 3                            |
| GO:0016639 | Oxidoreductase activity, acting on the CH-NH <sub>2</sub> group of donors, NAD or NADP as acceptor | 2.95                         |
| GO:0006355 | Regulation of transcription, DNA-dependent                                                         | 2.86                         |
| GO:0006470 | Protein dephosphorylation                                                                          | 2.71                         |
| GO:0004849 | Uridine kinase activity                                                                            | 2.21                         |
| GO:0019953 | Sexual reproduction                                                                                | 2.21                         |
| GO:0003677 | DNA binding                                                                                        | 2.21                         |
| GO:0004435 | Phosphatidylinositol phospholipase C activity                                                      | 2.21                         |
| GO:0004722 | Protein serine/threonine phosphatase activity                                                      | 2.2                          |
| GO:0006520 | Cellular amino acid metabolic process                                                              | 2.14                         |
| GO:0007165 | Signal transduction                                                                                | 2.13                         |
| GO:0006351 | Transcription, DNA-dependent                                                                       | 2.03                         |
| GO:0016746 | Transferase activity, transferring acyl groups                                                     | 2                            |
| GO:0000160 | Two-component signal transduction system (phosphorelay)                                            | 1.95                         |
| GO:0016787 | Hydrolase activity                                                                                 | 1.95                         |
| GO:0009607 | Response to biotic stimulus                                                                        | 1.87                         |
| GO:0033897 | Ribonuclease T2 activity                                                                           | 1.84                         |
| GO:0006221 | Pyrimidine nucleotide biosynthetic process                                                         | 1.84                         |
| GO:0019825 | Oxygen binding                                                                                     | 1.84                         |
| GO:0003883 | CTP synthase activity                                                                              | 1.84                         |
| GO:0015671 | Oxygen transport                                                                                   | 1.84                         |
| GO:0005634 | Nucleus                                                                                            | 1.73                         |
| GO:0016866 | Intramolecular transferase activity                                                                | 1.57                         |
| GO:0055085 | Transmembrane transport                                                                            | 1.56                         |
| GO:0008033 | tRNA processing                                                                                    | 1.48                         |
| GO:0003779 | Actin binding                                                                                      | 1.48                         |
| GO:0004419 | Hydroxymethylglutaryl-coa lyase activity                                                           | 1.48                         |
| GO:0008113 | Peptide-methionine-(S)-S-oxide reductase activity                                                  | 1.48                         |
| GO:0016791 | Phosphatase activity                                                                               | 1.48                         |
| GO:0008967 | Phosphoglycolate phosphatase activity                                                              | 1.48                         |
| GO:0006913 | Nucleocytoplasmic transport                                                                        | 1.43                         |
| GO:0008964 | Phosphoenolpyruvate carboxylase activity                                                           | 1.43                         |
| GO:0042626 | ATPase activity, coupled to transmembrane movement of substances                                   | 1.4                          |
| GO:0017111 | Nucleoside-triphosphatase activity                                                                 | 1.39                         |
| GO:0015035 | Protein disulfide oxidoreductase activity                                                          | 1.35                         |

**Table S6 Sequences of primes using in this study**

| LncRNAs/Actin         | Sense primes (5'-3') | Antisense primes (5'-3') |
|-----------------------|----------------------|--------------------------|
| <i>TCONS_00013236</i> | ACAGGCCCTCAATAGAA    | CGAGGAGCTTCAGAAAGA       |
| <i>TCONS_00013833</i> | TCAATGTGGTCGTAGCGT   | CTTGCGATGAGTTGGGTT       |
| <i>TCONS_00029016</i> | TCTTCCCATGACAATACA   | AATAGCCAAAGCTCTAAC       |
| <i>TCONS_00036404</i> | GAGCCCTGCTTTACCTTT   | GTGTCGCTAATGCGTTGC       |
| <i>TCONS_00036970</i> | ATTTTCATAGGCTGTGGAT  | TTTACTCGGTCTGTCTCC       |
| <i>TCONS_00046739</i> | CAACTCCTCCTGCAATCA   | TCCAAACCTAAGACCCTA       |
| <i>TCONS_00051006</i> | TCCACCACTTGGGTAGAC   | TACCTGGATGGGGTCAAT       |
| <i>TCONS_00075827</i> | CAGTATCAATTTAGGTGGGC | CAAATGACCGAAGTAGCG       |
| <i>TCONS_00078084</i> | AGAGTGTAGCCCTGAACG   | TCACTGCCGAAAGAGGAG       |
| <i>TCONS_00089174</i> | TTGAGGTCGGGCAAGTAT   | TGGATTTGAACCAGCGTA       |
| <i>TCONS_00100258</i> | CCTTACTGGTGCTTTGTC   | TTCATACCTGTTTCTCCC       |
| <i>TCONS_00118328</i> | TCCGAGATTTAACCTTTAC  | CTATGTTTGGGTATCTGTAT     |
| <i>Actin</i>          | ACGAGCGTTTCAGATG     | ACCTCCGATCCAGACA         |
